# Supplementary figures and images for: A Personalized Approach to Percutaneous Coronary Interventions in the Left Main Coronary Artery—Is the Female Gender Associated with Worse Outcomes?
Source: MDPI journal article supplement (doi:10.3390/jpm11060581), 2021-06-20

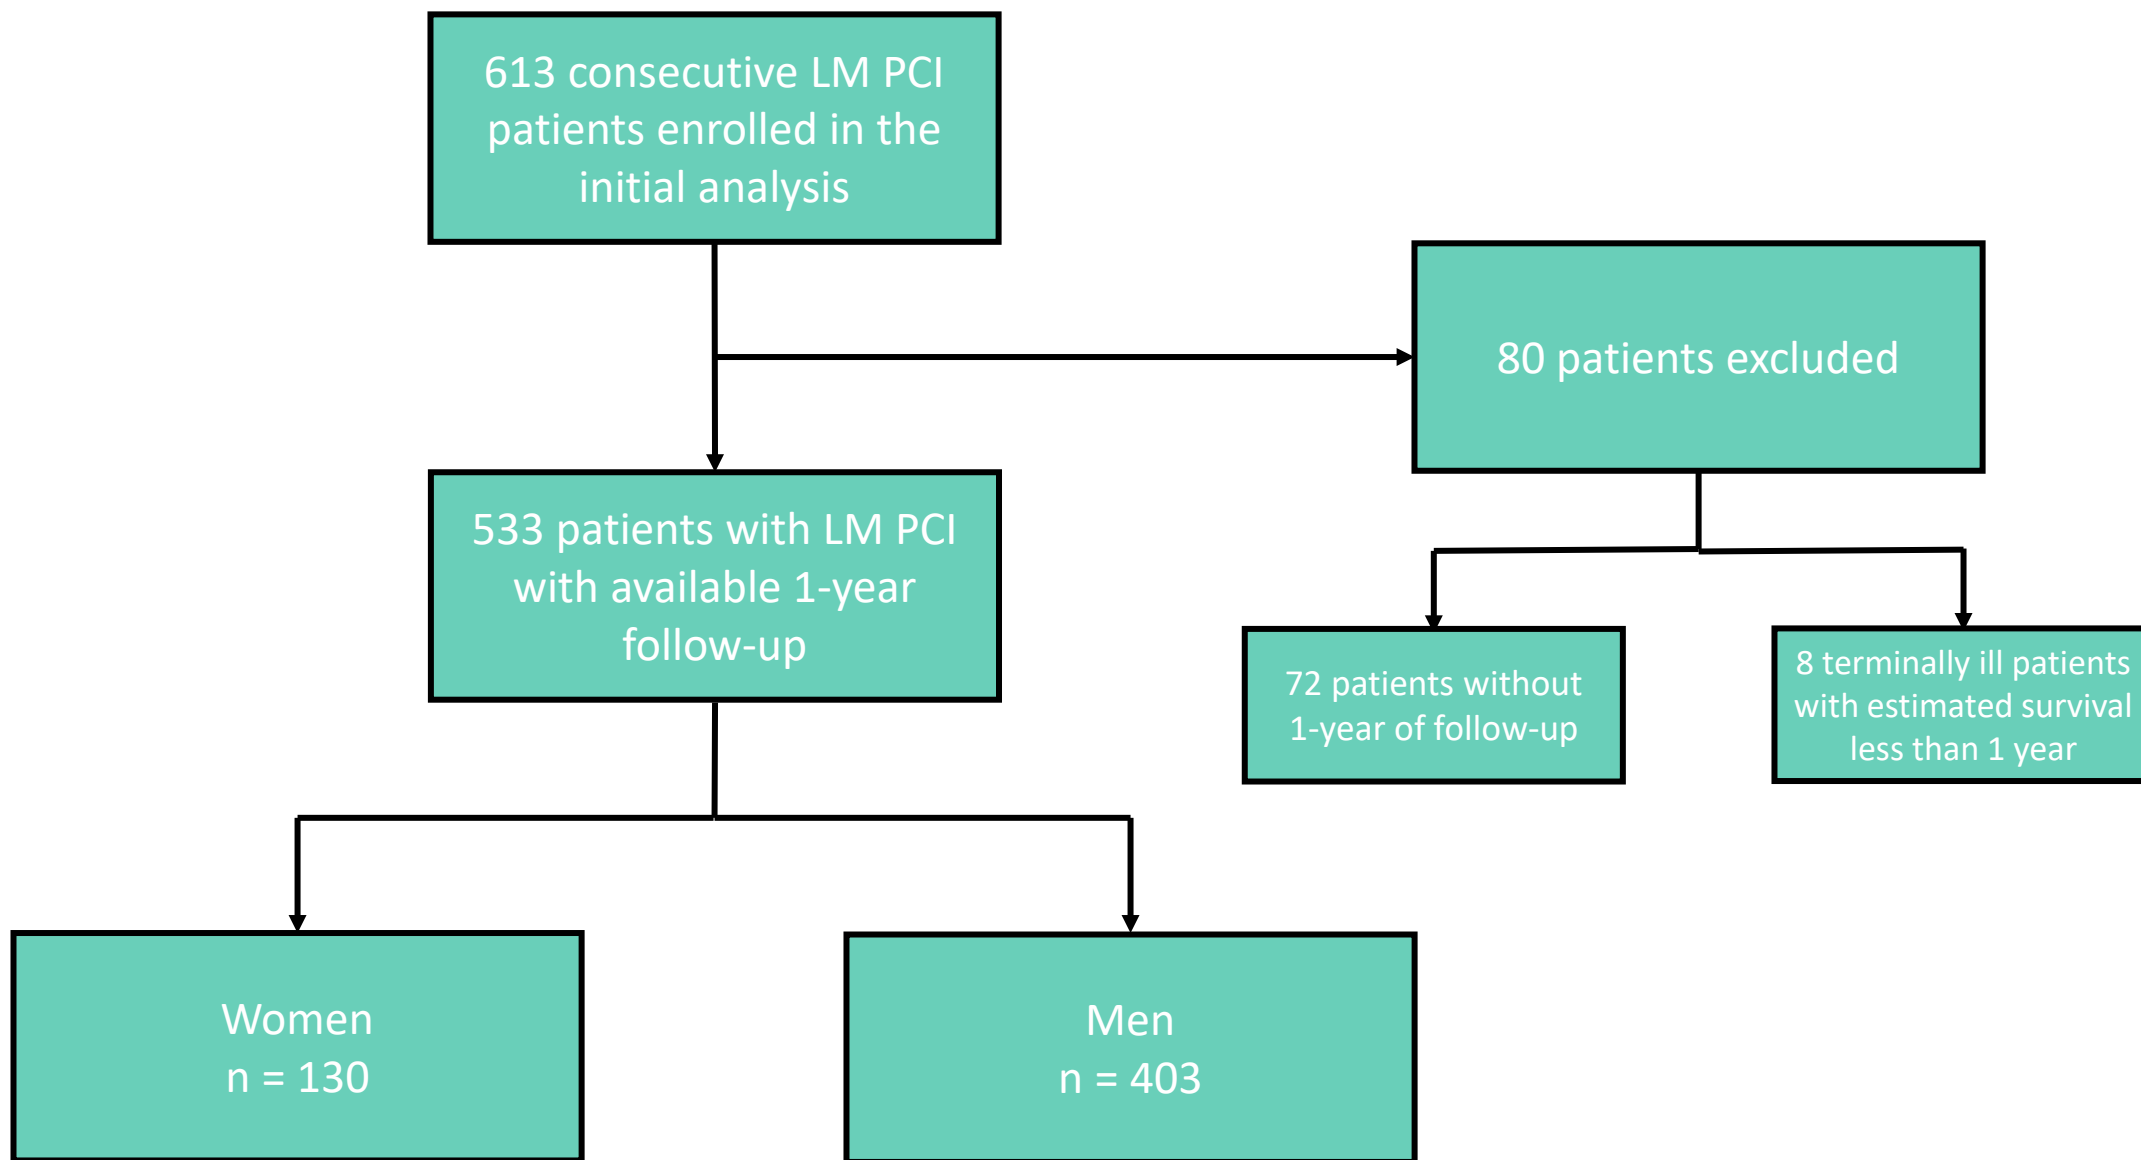

Supplement: s1 [file s1]
